# Supplementary material for: Formation of O adatom pairs and charge transfer upon O2 dissociation on reduced TiO2(110)
Source: Royal Society of Chemistry journal article supplement (doi:10.1039/c000250j), 2010-01-01
Supplement: c000250j.pdf [file c000250j.pdf]

## Supporting Information

### **Formation of O adatom pairs and charge transfer upon O<sub>2</sub> dissociation on reduced TiO<sub>2</sub>(110)**

Yingge Du, Nathaniel A. Deskins,<sup>†</sup> Zhenrong Zhang, Zdenek Dohnalek, Michel Dupuis,  
and Igor Lyubinetsky\*

*Environmental Molecular Science Laboratory, and Fundamental and Computational  
Sciences Directorate, Institute for Interfacial Catalysis, Pacific Northwest National  
Laboratory, Richland, Washington 99352*

E-mail: igor.lyubinetsky@pnl.gov

---

<sup>†</sup> *Present address: Worcester Polytechnic Institute, Department of Chemical Engineering, 100 Institute Road, Worcester, MA 01609, USA.*

**S1:** STM movie (S1.avi) of the  $(25 \times 25) \text{ nm}^2$  area of  $\text{TiO}_2(110)$  surface taken during  $\sim 80$  min of  $\text{O}_2$  dosing, with an acquisition time of 126 s per frame. More than 160  $\text{O}_2$  dissociation events resulted in O vacancy,  $V_{\text{O}}$ , healing and depositing single O adatoms,  $\text{O}_a$ , and also the appearance of  $\text{O}_a$ - $\text{O}_a$  pairs, all have been recorded. (The sample had an initial  $V_{\text{O}}$  concentration of 0.12 ML).

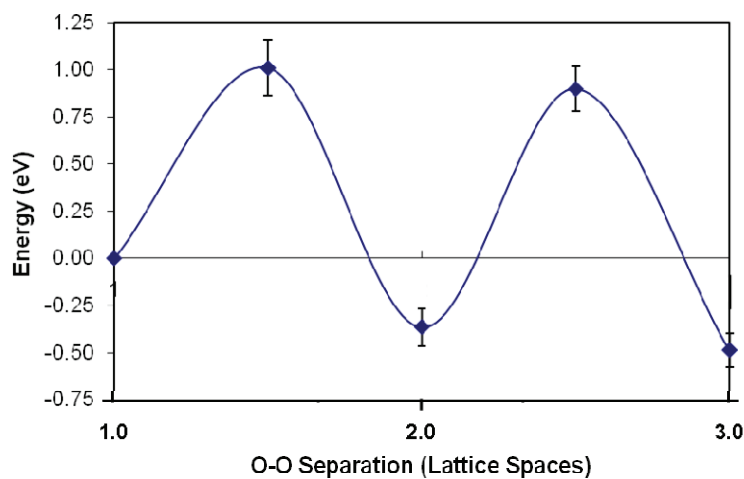

**Figure S2.** Average relative energies for  $O_a$ - $O_a$  pairs separated by one, two, or three lattice spaces away. The configuration with the  $O_a$ - $O_a$  pair separated by one lattice site is taken as 0 eV. The results have been averaged over many different configurations, where the  $V_O$  locations within the  $6 \times 2$  supercell have been varied relative to the  $O_a$ . The error bars indicate the standard deviation from the averaged results.

### S3: Modeling

#### S3.1 Scenario 1 (total formal charge can be withdrawn from a $V_O$ )

$V$  – Initial coverage of  $V_O$ 's

$O_1$  – Coverage of single  $O_a$ 's in the presence of only  $V_O$ 's (no Ti interstitials)

$O_2$  – Coverage of paired  $O_a$ 's in the presence of only  $V_O$ 's

$\delta^-$  – Effective charge of an  $O_a$

Since each  $V_O$  has nominally two unpaired electrons, then in the presence of only  $V_O$ 's (no Ti interstitials) the full surface charge available to facilitate  $O_2$  dissociation is  $V2e^-$ .

The  $O_2$  molecules dissociate at both  $V_O$  and terminal Ti sites. Complete charge withdrawn from  $V_O$ 's upon  $O_2$  dissociation at  $V_O$  sites, which results in one annihilated  $V_O$  and one  $O_a$  formation, is  $O_1(2e^- + \delta^-)$ . Complete charge withdrawn from  $V_O$ 's upon  $O_2$  dissociation at Ti sites, which results in  $O_a$ - $O_a$  pair formation, is  $O_2\delta^-$ . Accordingly, full charge withdrawn from  $V_O$ 's upon  $O_2$  dissociation is  $O_1(2e^- + \delta^-) + 2O_2\delta^-$ .

Then, charge balance in the presence of only  $V_O$ 's can be written as:

$$(1) \quad V2e^- = O_1(2e^- + \delta^-) + O_2\delta^-$$

The ratio between paired and single  $O_a$ 's of  $\sim 0.6$  (0.036/0.059) has been estimated from experimental data in Figure 6 (whereby presumably both  $V_O$  and Ti interstitials could provide charge). Since it is reasonable to expect that reaction rates for  $O_2$  dissociation either at  $V_O$  or Ti sites do not depend much on the source of extra charge ( $V_O$ 's or Ti interstitials), we assume that the ratio between paired and single  $O_a$ 's in the presence of only  $V_O$ 's (no Ti interstitials),  $O_2/O_1$ , is about the same (0.6).

Then, for a case where  $\delta^- = 2e^-$  (a full formal charge), the total  $O_a$  number can be deduced from the initial  $V_O$  coverage (0.12 ML) using equation (1), as 0.074 ML.

For a case where  $\delta^- = 0.7e^-$  (a Bader charge),  $O_2 + O_1$  is  $\sim 0.11$  ML.

#### S3.2 Scenario 2 (only a fraction of charge can be withdrawn from a $V_O$ )

$V_u$  – Saturation coverage of  $V_O$ 's left unfilled

$O_a$  – Saturation coverage of  $O_a$ 's attributed to  $V_O$ 's

$\delta^-$  – Effective charge of an  $O_a$

$\delta_V^-$  – Charge withdrawn from a  $V_O$

Maximum charge transferred to  $O_a$ 's from  $V_O$ 's can be written as:

$$(2) \quad O_a\delta^- = V_u\delta_V^-$$

The recent STM studies indicate that all bridging hydroxyls can be removed from a fully hydroxylated  $TiO_2(110)$  by reaction with  $O_2$ .<sup>1,2</sup> If all the available charge would be provided by  $V_O$ 's, the reaction would terminate after full oxidation of the surface is

reached. Nonetheless, the formation of O containing species on Ti rows has been observed after further O<sub>2</sub> exposure, with a saturation coverage of ~ 40% of original V<sub>O</sub> concentration, indicating a presence of additional charge (likely Ti interstitial related) that mediates further O<sub>2</sub> dissociation.<sup>3</sup> In our case with initial V<sub>O</sub> coverage of 0.12 ML, it will correspond to 0.048 ML of O<sub>a</sub>'s attributed to Ti interstitial. Thus, O<sub>a</sub> (saturation coverage of O<sub>a</sub>'s attributed to V<sub>O</sub>'s) is 0.047 ML out of 0.095 ML (saturation coverage for O<sub>a</sub>'s projected from the experimental data, Figure 6). Further, after taking into account the coverage of unfilled V<sub>O</sub>'s (V<sub>u</sub> = 0.06 ML, Figure 6), one can estimate the average amount of charge donated by each V<sub>O</sub>.

For a limiting case where  $\delta^- = 2e^-$  (a full formal charge) and using equation (2),  $\delta_V^-$  is found to be  $\sim 1.6e^-$ .

For a case where  $\delta^- = 0.7e^-$  (a Bader charge),  $\delta_V^-$  is  $\sim 0.5e^-$ .

---

## References

- (1) Wendt, S.; Sprunger, P. T.; Lira, E.; Madsen, G. K. H.; Li, Z.; Hansen, J. O.; Matthiesen, J.; Blekinge-Rasmussen, A.; Laegsgaard, E.; Hammer, B.; Besenbacher, F. *Science* **2008**, *320*, 1755.
- (2) Zhang, Z.; Du, Y.; Petrik, N. G.; Kimmel, G. A.; Lyubinetsky, I.; Dohnalek, Z. *J. Phys. Chem. C* **2009**, *113*, 1908.
- (3) Petrik, N. G.; Zhang, Z. R.; Du, Y. G.; Dohnalek, Z.; Lyubinetsky, I.; Kimmel, G.A. *J. Phys. Chem. C* **2009**, *113*, 12407.
